# Supplementary material
Source: PubMed Central journal article supplement (PMC7448696)
Supplement: NIHMS1617805-supplement-Suppl.pdf [file NIHMS1617805-supplement-Suppl.pdf]

## Supplemental Material

### *Additional Analyses of Affective Stroop Performance*

In addition to 3-way rANOVAs reported in the manuscript, behavioral measures were analysed with 4-way Diagnosis (HC, ANX) x Emotion (Negative, Neutral, Positive) x Task (Congruent, Incongruent) x Condition (Safe, Threat) rANOVAs. For reaction time, the 4-way rANOVA revealed a main effect of Diagnosis ( $F(1,65)=4.74, p=.03; \eta^2=.07$ ), with longer reaction time in the ANX compared to the HC group. Diagnosis did not interact with Condition, Task, or Emotion effects. For accuracy, the 4-way accuracy rANOVA revealed a Condition x Emotion interaction ( $F(2,130)=3.37, p=.04; \eta^2=.05$ ). Threat increased accuracy compared to Safe during Negative ( $t(66)=2.58, p=.01; 95\% \text{ CI } [.27, 2.15]$ ) and Neutral ( $t(66)=2.87, p=.01; 95\% \text{ CI } [.41, 2.30]$ ), but not during Positive ( $t(66)=.55, p=.58; 95\% \text{ CI } [-1.40, .80]$ ), pictures. There were no effects or interactions of Diagnosis or Task.
